# Supplementary material
Source: MDPI journal article supplement (https://www.mdpi.com/2073-4352/10/6/432)
Supplement: s1 [file s1]

Table S1. Assignment of FTIR absorption bands of biominerals extracted from tissues of Cactae species.

| Wavenumber<br>(cm <sup>-1</sup> ) | Assignments                                                                     | References of wavenumbers<br>(cm <sup>-1</sup> ) | References |
|-----------------------------------|---------------------------------------------------------------------------------|--------------------------------------------------|------------|
| 3466-3420                         | OH stretching (associated to water and calcium oxalate dihydrate)               | 3469; 3559-3257; 3600-3200                       | [29,32,33] |
| 2928-2916                         | CH <sub>2</sub> asymmetrical vibration (cellulose residues)                     | 3000-2800; 2959, 2925                            | [29,34]    |
| 2854-2849                         | CH stretching (cellulose residues)                                              | 3000-2800; 2866, 2854                            | [29,34]    |
| 1734-1729                         | C=O stretching (hemicellulose residue, ester bonds)                             | 1732                                             | [29,30]    |
| 1648 -1594                        | CO asymmetrical vibration (associated to calcium oxalate dihydrate)             | 1640; 1640-1638                                  | [32,33]    |
| 1476-1466                         | CO symmetrical vibration (associated to calcium oxalate dihydrate))             | 1475                                             | [33]       |
| 1410                              | CO stretching (calcium carbonate)                                               | 1450-1410; 1450-1410                             | [29,39]    |
| 1332-1317                         | CO symmetrical vibration (associated to calcium oxalate dihydrate)              | 1330-1327; 1319                                  | [32,33]    |
| 1235                              | C=O stretching (hemicellulose residue, ester bonds)                             | 1240                                             | [29,30]    |
| 1162-1143                         | C-O-C (cellulose residue; β-1,4 glycosyl)                                       | 1170-1150                                        | [30]       |
| 1096-1026                         | Si-O-Si asymmetric stretching modes (associated to silicates or opal)           | 1020, 1093; 1080; 1100-900                       | [29,34,35] |
| 913-910                           | CO symmetrical vibration (associated to calcium oxalate dihydrate)              | 917-915; 915                                     | [32,33]    |
| 894                               | C-O in plane bending (associated to calcium carbonate)                          | 874; 880-800                                     | [29,39]    |
| 771-754                           | OCO scissoring + libration HOH (associated to calcium oxalate dihydrate)        | 770                                              | [33]       |
| 701                               | C-O in plane bending (associated to calcium carbonate)                          | 715                                              | [39]       |
| 517                               | OCO libration wagging + libration OHO (associated to calcium oxalate dihydrate) | 516 - 400                                        | [33]       |
